# Supplementary material for: Investigation of multiple Felis catus papillomavirus types (-1/-2/-3/-4/-5/-6) DNAs in feline oral squamous cell carcinoma: a multicentric study
Source: PubMed Central journal article supplement — J Vet Med Sci. 2022 Apr 15;84(6):881–4. doi: 10.1292/jvms.22-0060 (PMC9246691; doi:10.1292/jvms.22-0060), 2022-04-15
Supplement: jvms-84-881-s001.pdf [file jvms-84-881-s001.pdf]

| Viral Type | Viral Gene | Primers Names | Primer Sequence 5'-3'     | Annealing T°C | Product size (bp) |
|------------|------------|---------------|---------------------------|---------------|-------------------|
| FcaPV-1    | E1         | FPV1F         | TACGCTTCTCTTGCTGACAC      | 50°C          | 175               |
|            |            | FPV1R         | CGTCTCCCTGTGCACTTTTAC     |               |                   |
|            | E6         | FcaPV-1 E6F   | CAATGGAAACAGGGCTGTGC      | 60°C          | 204               |
|            |            | FcaPV-1 E6R   | TTCGAGGCAGCACTGGATTT      |               |                   |
| FcaPV-2    | L1         | JMPF          | GTGCCGAAGGTCTCCTCTTC      | 50°C          | 177               |
|            |            | JMPR          | GTGTCTGTAGTTCCTATAAC      |               |                   |
|            | E6         | E6 FW         | TACGAGCGCGAGCATTTTTG      | 59.9°C        | 134               |
|            |            | E6 REV        | TGCAGCTTTTCTCCTGGTGT      |               |                   |
| FcaPV-3    | L1         | JMY2F         | TCAGGGCACGCAAGAAGTCA      | 60°C          | 202               |
|            |            | JMY2R         | ACCTGTCTGTGGTGCAGGAACA    |               |                   |
|            | E6         | FcaPV-3 E6F   | CCCGCAGAGTGTATCCTTGT      | 60°C          | 206               |
|            |            | FcaPV-3 E6R   | GCGCAAGCACCATCAATCTC      |               |                   |
| FcaPV-4    | L1         | JMY3F         | GGTCAGTATAACCCAGAGCAGAGCA | 60°C          | 246               |
|            |            | JMY3R         | AGGAGGCACCTTGTCTGGGCA     |               |                   |
|            | E6         | FcaPV-4 E6F   | CGACTGCGCAAGCAACATTA      | 60°C          | 192               |
|            |            | FcaPV-4 E6R   | CGGCAACACCCTCTCCAATA      |               |                   |
| FcaPV-5    | L1         | FcaPV-5 L1F   | ACCTACATCGCGCATAGCAA      | 59.9          | 139               |
|            |            | FcaPV-5 L1R   | CACTTTTGGCACGTCCACTG      |               |                   |
|            | E6         | FcaPV-5 E6F   | GGGTGCTGTCTCCGTTTATC      | 59°C          | 197               |
|            |            | FcaPV-5 E6R   | TGACGCACTAGATGCAAAGG      |               |                   |
| FcaPV-6    | L1         | FcaPV-6 L1F   | CACAGAGAATCCCACCGCAT      | 60°C          | 153               |
|            |            | FcaPV-6 L1R   | TTAGCCCCTGCTTACAAGG       |               |                   |
|            | E6         | FcaPV-6 E6F   | ATCCAGATGGCAAAGGCGAA      | 60°C          | 160               |
|            |            | FcaPV-6 E6R   | GTTCTGTCAGAAGCAGACCT      |               |                   |

**Supplementary Table 1:** Details of PCR primers used in this work for each gene of each *Felis catus* papillomavirus (FcaPV) type. Primers names, nucleotide sequences, annealing temperatures (T°C) and product sizes (bp: base pairs) of amplified fragments for each viral gene are indicated.

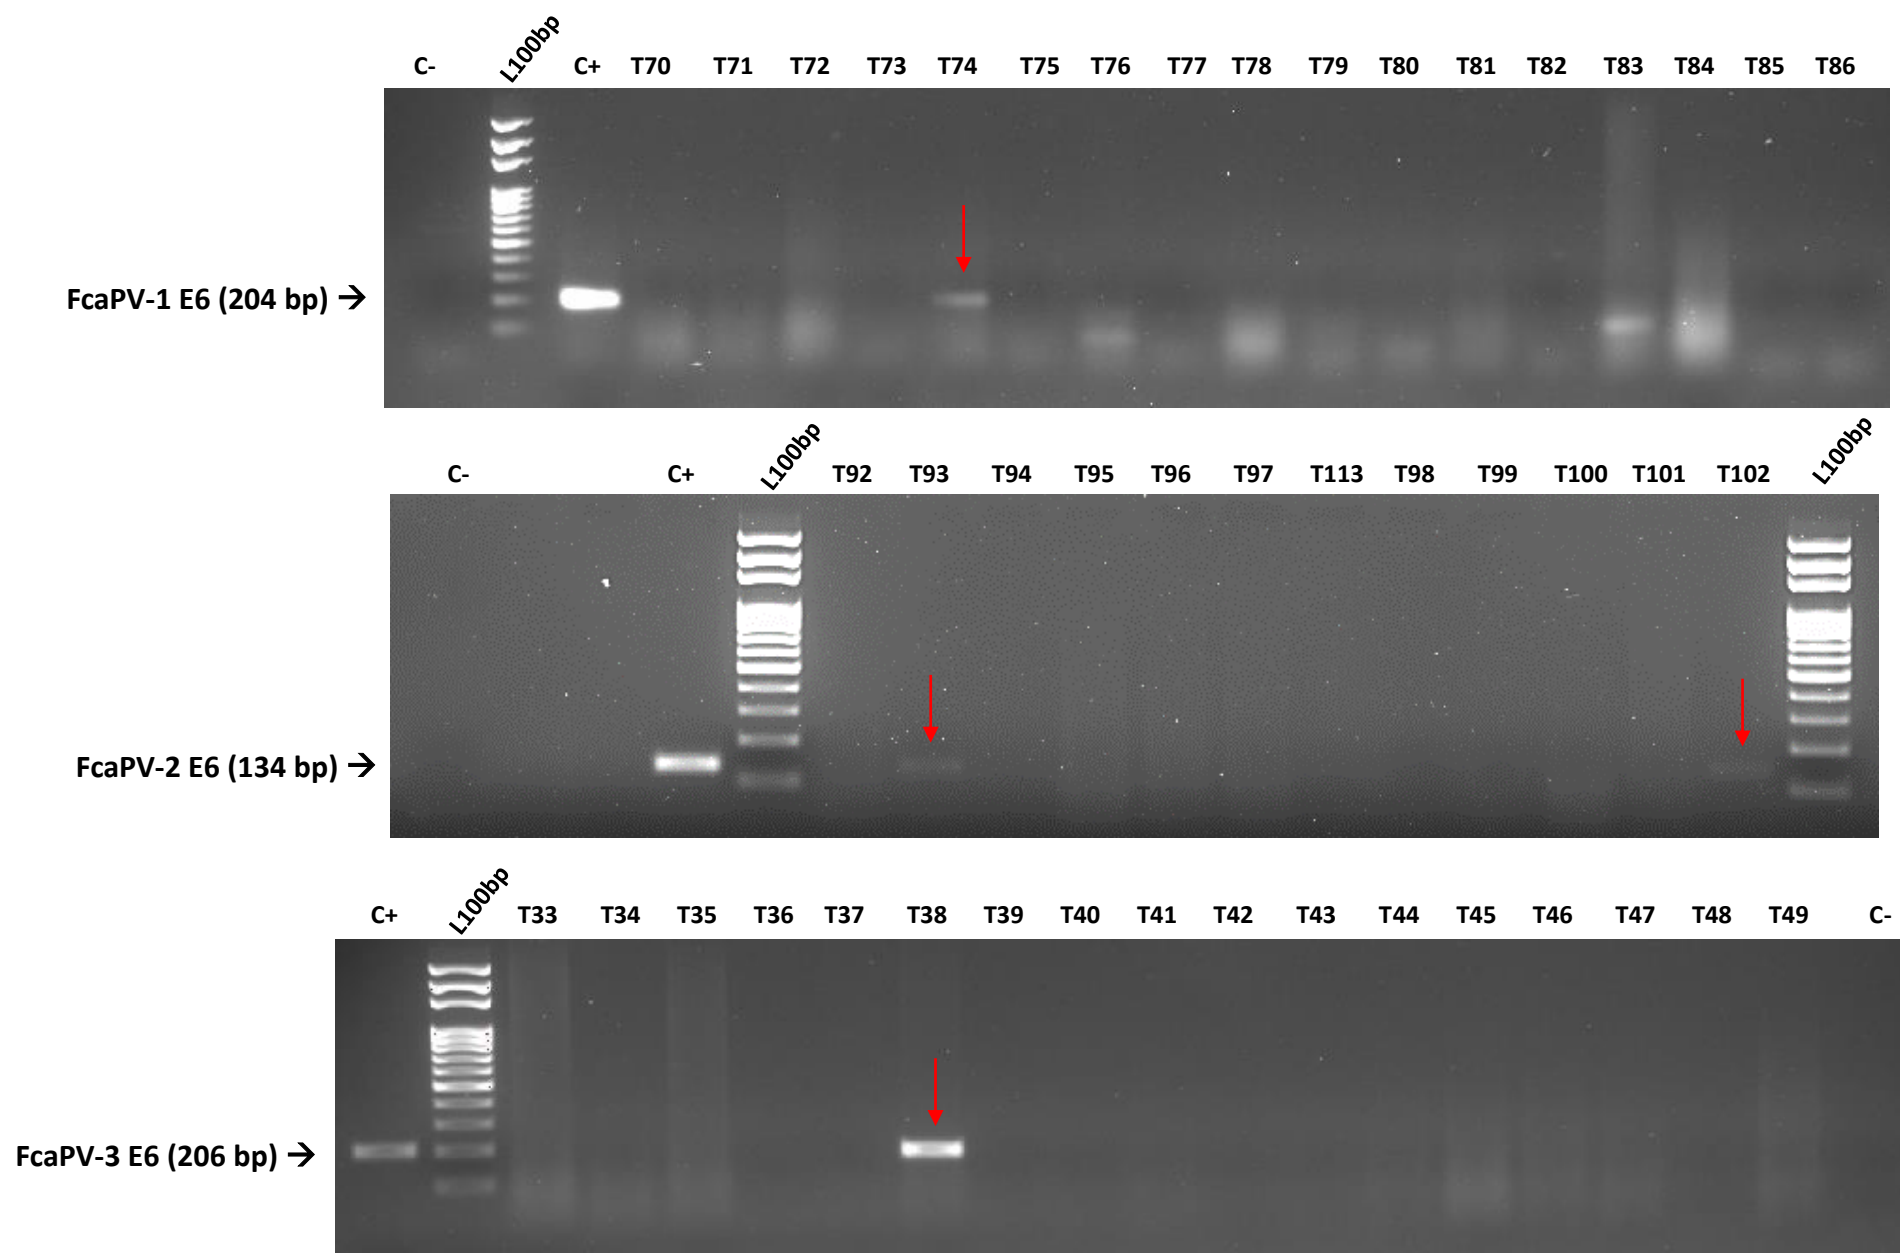

**Supplementary Figure 1.** Representative electrophoresis gels showing PCR results for FcaPV-1 E6 (204 bp), FcaPV-2 E6 (134 bp) and FcaPV-3 E6 (206 bp) in a subset of samples analyzed in this study. Red arrows show positive samples (C-: negative control; C+: positive control; L100bp: ladder 100 base pairs).

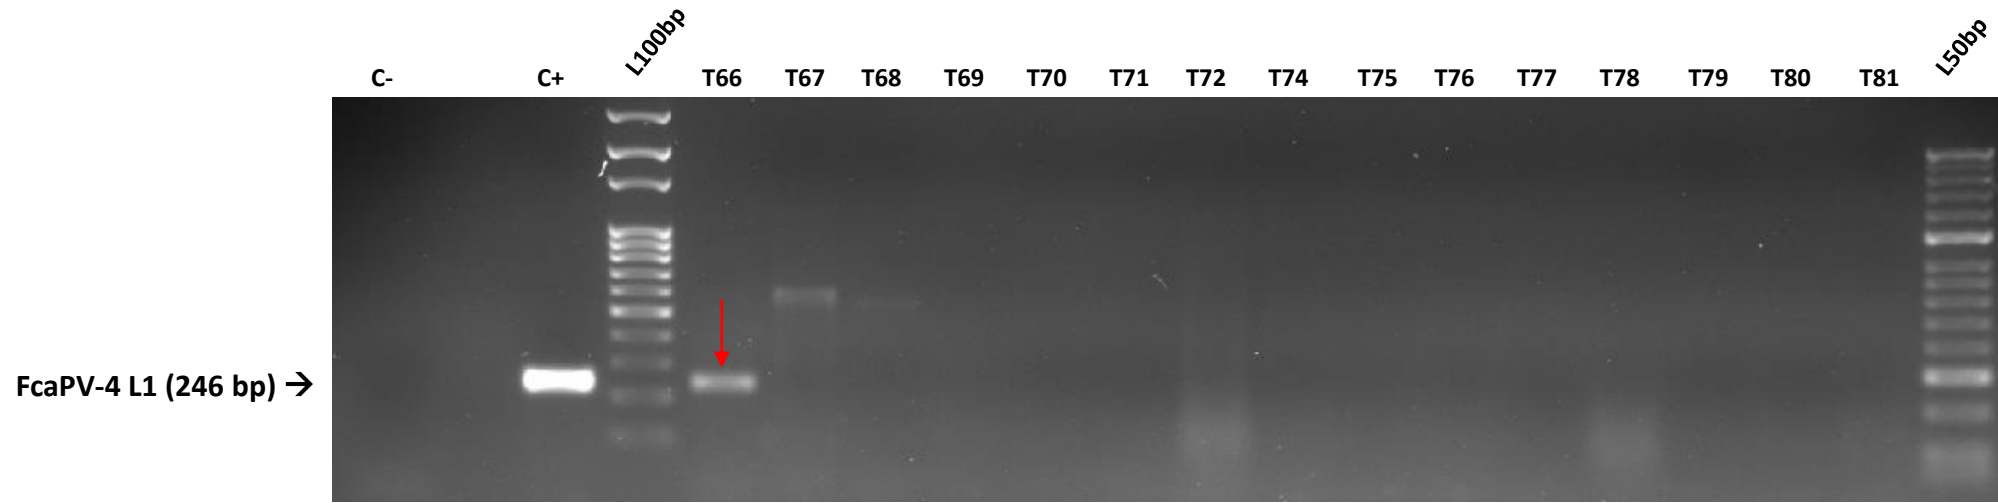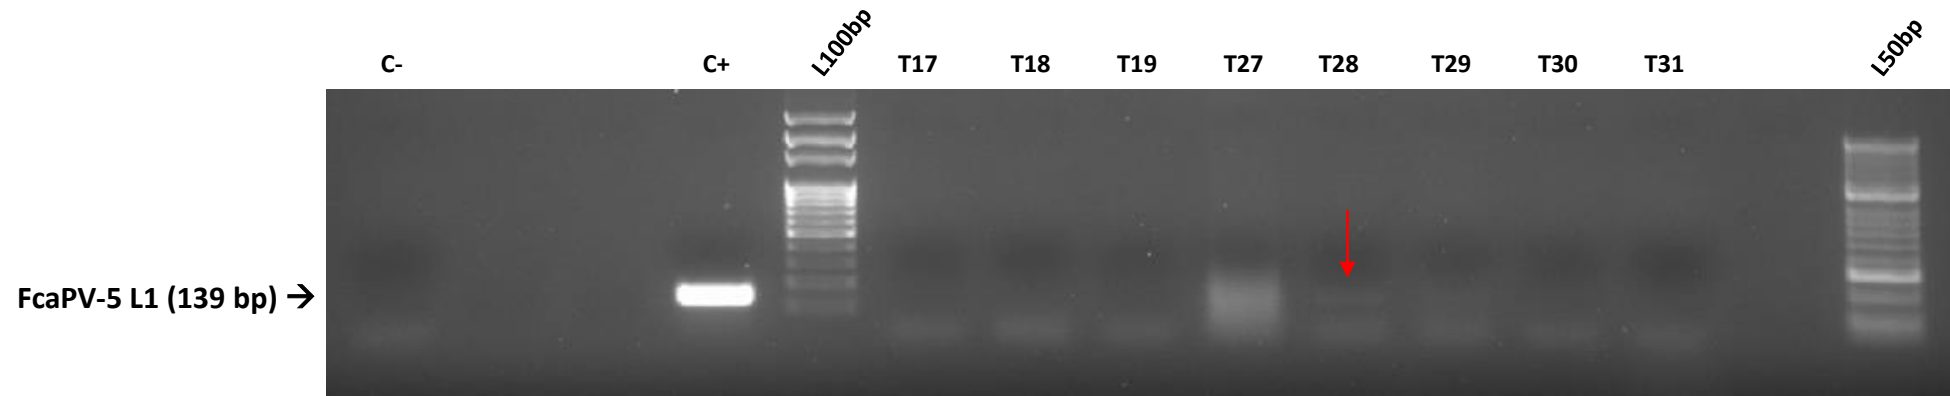

**Supplementary Figure 2.** Representative electrophoresis gels showing PCR results for FcaPV-4 L1 (246 bp) and FcaPV-5 L1 (139 bp) in a subset of samples analyzed in this study. Red arrows show positive samples (C-: negative control; C+: positive control; L100bp: ladder 100 base pairs; L50bp: ladder 50 base pairs).
